# Supplementary material for: Structure of the human ClC-1 chloride channel
Source: PLoS Biol. 2019 Apr 25;17(4):e3000218. doi: 10.1371/journal.pbio.3000218 (PMC6483157; doi:10.1371/journal.pbio.3000218)
Supplement: S1 Table — cryo-EM, cryo-electron micrscopy. (XLSX) [file pbio.3000218.s012.xlsx]

## Sheet: Sheet1
EMDB	EMD-4645	EMD-4647	EMD-4649	EMD-4646	EMD-4657
pdb-id	6QV6	6QVC	6QVD	6QVB	6QVU
Data statistics	map 0, pH 7.5	map 1, pH 7.5	map 2, pH 7.5	map 3, pH 7.5	map pH 6.2
Model-map-fit CC	0.81	0.81	0.762	0.756	0.736
R.m.s.d.
bonds (Å)	0.010	0.008	0.016	0.012	0.009
angles (°)	1.290	1.471	2.060	1.580	1.635
Molprobity statistics
Ramachandran Plot
Favored (%)	91.6	91.1	90.3	80.0	89.9
Allowed (%)	8.0	8.4	9.6	10.0	9.5
Non-favored (%)	0.4	0.5	0.0	0.2	0.6
Rotamer outliers (%)	1.0	2.1	4.4	1.8	2.3
Clash score	4.7	8.9	14.8	12.0	12.7
Average B-factor (Å2)	118.0	178.0	267.0	303.0	325.3
